# Supplementary material for: Short-Chain Sulfur Confined into Nitrogen-Doped Hollow Carbon Nanospheres for High-Capacity Potassium Storage
Source: MDPI journal article supplement (doi:10.3390/nano14060550), 2024-03-20
Supplement: s1 [file s1]

# Supporting information

## Short-Chain Sulfur Confined into Nitrogen-Doped Hollow Carbon Nanospheres for High-Capacity Potassium Storage

Wenhan Liu <sup>1</sup>, Tengfei Shi <sup>1</sup>, Fang Liu <sup>1</sup>, Chen Yang <sup>1</sup>, Fan Qiao <sup>1</sup>, Kang Han <sup>1</sup>, Chunhua Han <sup>1,2,\*</sup>, Jiashen Meng <sup>1</sup> and Xuanpeng Wang <sup>1,2,3,\*</sup>

<sup>1</sup> State Key Laboratory of Advanced Technology for Materials Synthesis and Processing, School of Materials Science and Engineering, Wuhan University of Technology, Wuhan 430070, China;

lwh\_803@whut.edu.cn (W.L.); shift@whut.edu.cn (T.S.);

fang\_liu3@whut.edu.cn (F.L.);

253632@whut.edu.cn (C.Y.); fanqiao@whut.edu.cn (F.Q.);

hankang@whut.edu.cn (K.H.); jsmeng@whut.edu.cn (J.M.)

<sup>2</sup> Hubei Longzhong Laboratory, Wuhan University of Technology (Xiangyang Demonstration Zone), Xiangyang 441000, China

<sup>3</sup> Department of Physical Science & Technology, School of Science, Wuhan University of Technology, Wuhan 430070, China

\* Correspondence: hch5927@whut.edu.cn (C.H.); wxp122525691@whut.edu.cn (X.W.);

Tel.: +86-13545284506 (X.W.)

### Material characterizations

JSM-7100F scanning electron microscope (SEM) and Titan Themis G2 60-300 transmission electron microscopy (TEM) were utilized to characterize the microscopic features of the samples. Additionally, the TEM is equipped with an X-ray energy spectrum analysis system, which aids in the qualitative analysis of material composition and distribution. The D8 Advance powder X-ray diffractometer was used to determine the structures of the as-prepared materials with Cu K $\alpha$ . The corresponding voltage and current parameters are 20 kV and 10 A, respectively, and the test angle is 10–80° at a scan rate of 5° min<sup>-1</sup>. TGA was performed on an STA-449F5 instrument in Argon atmosphere with a temperature

ramp of 10 °C min<sup>-1</sup> to verify the thermal stability of SHC-450. Raman spectroscopy experiments were performed on the HORIBA LabRAM HR Evolution micro-Raman spectroscopy system with the 532 nm laser. The valence states investigation was conducted using X-ray photoelectron spectroscopy (XPS) with a VG Multilab 2000 system. To mitigate the interference caused by potassium salts in the electrolyte, the electrodes were retrieved by disassembling the cells in a glovebox, and any remaining salt residue was eliminated using DME solvent. The BET surface area was calculated from nitrogen adsorption isotherms collected at 77 K using a Tristar 3020 instrument. Time-of-flight secondary ion mass spectrometry (TOF-SIMS) was conducted on PHI nano-TOF III.

## **Electrochemical measurements**

The SHC-450 and HC-450 electrodes were prepared by casting a homogeneous slurry, which was achieved by blending the active material, Ketjen Black, and binder (sodium carboxymethyl cellulose/Styrene-Butadiene Rubber, weight ratio of 1:1) in deionized water at a weight ratio of 7:2:1 onto a Cu foil and then dried at 70°C for 10h. Subsequently, circular sections with a diameter of 10 mm were excised from these desiccated electrodes, resulting in a mass loading of 0.8–1 mg cm<sup>-2</sup> of active material. The 2016 coin cells were assembled in a pure argon gas filled glovebox with both oxygen and water below 0.01 ppm. A potassium foil was used as the counter electrode. Grade GF/D Whatman glass microfiber filter was employed as the separator and 5 M KFSI in 1,2-dimethoxyethane (DME) was used as the electrolyte. Galvanostatic charge–discharge measurements were performed using a multichannel battery testing system (LAND CT2001A) in the potential range from 0.01 to 3.0 V (vs. K/K<sup>+</sup>) at different current densities. CVs were collected at room temperature using an Autolab PGSTAT302N. A LAND CT2001A multichannel testing system was used to measure the GITT curve as well. It discharged at a rate of 50 mA g<sup>-1</sup> for

10 minutes before relaxing in an open circuit for 30 minutes. The value of  $D_{K+}$  can be calculated in below Equation

$$D = \frac{4}{\pi\tau} \left( \frac{m_B V_M}{M_B S} \right)^2 \left( \frac{\Delta E_S}{\Delta E_\tau} \right)^2$$

where  $\tau$  is the duration of the current impulse;  $m_B$ ,  $S$ ,  $V_M$ , and  $M_B$  denote the mass load of the electrode material, active electrode surface area, molar volume and molar mass of carbon, respectively.  $\Delta E_S$  is the quasi-thermodynamic equilibrium potential difference before and after the current pulse, and  $\Delta E_\tau$  represents the potential difference during the current pulse.

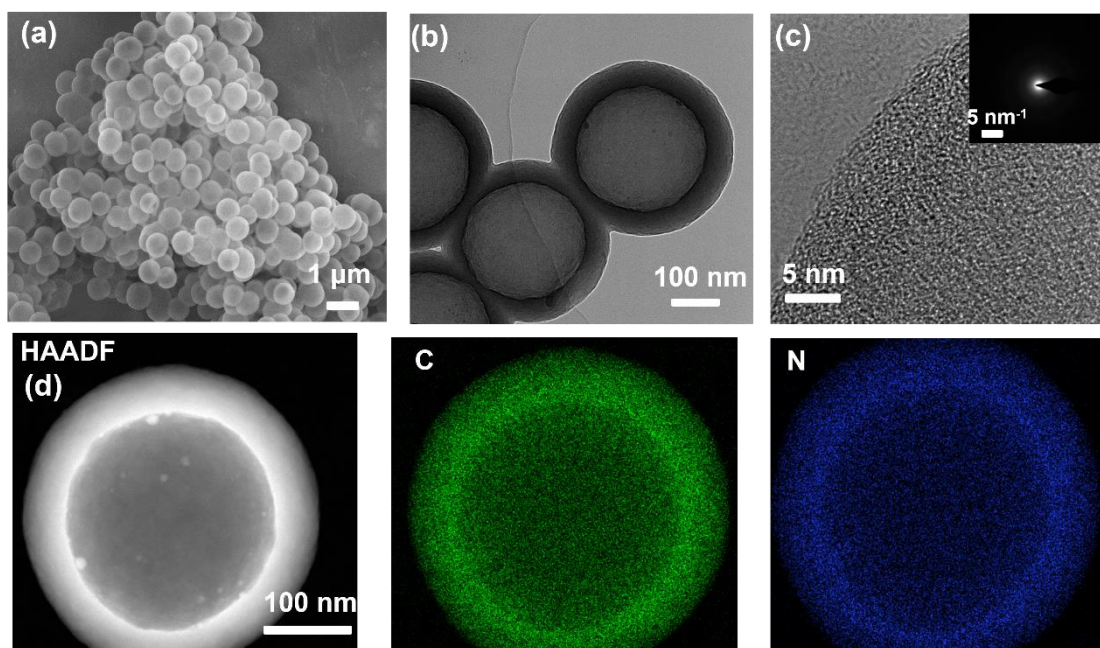

Figure S1. Characterization of HC-450. (a) SEM image. (b–c) TEM images at different magnifications of HC-450. Inset of (c) is an SAED pattern; (d) C and N element mapping images of HC-450.

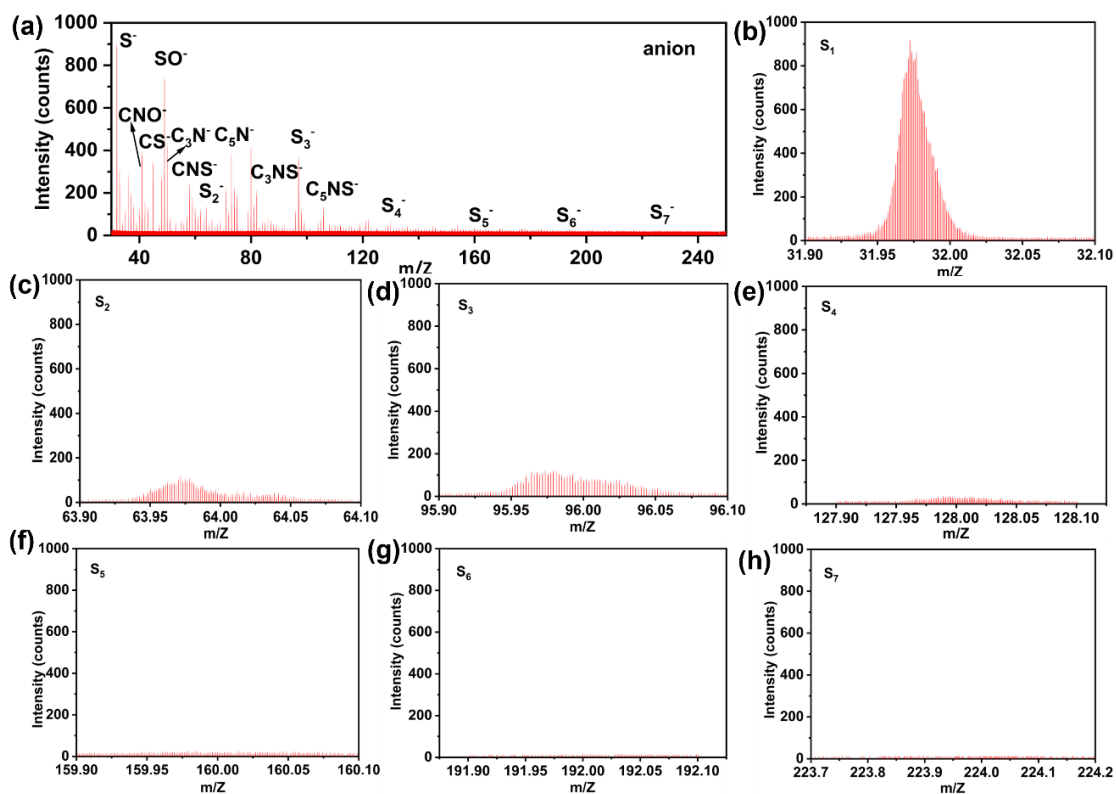

Figure S2. TOF-SIM mass spectra of the SHC-450 sample.

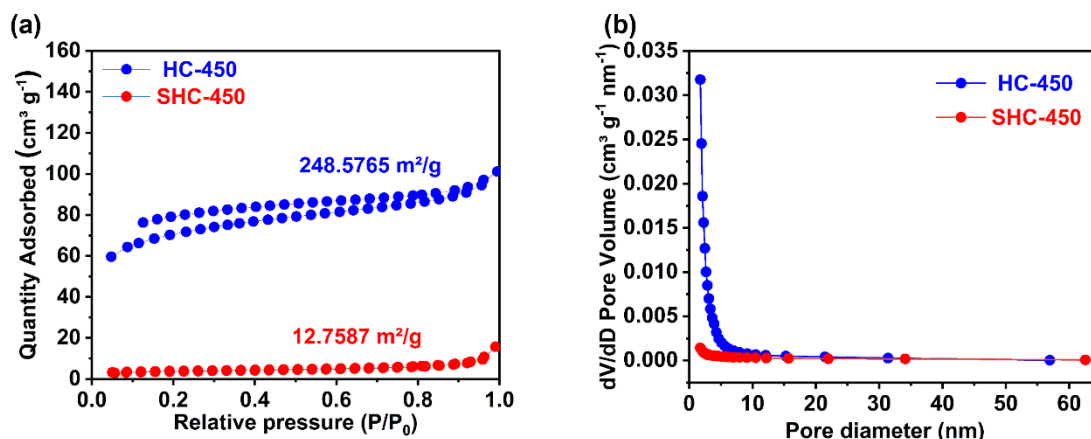

Figure S3. Nitrogen adsorption-desorption isothermal curves of SHC-450 and HC-450. (b) Pore size distribution of SHC-450 and HC-450.

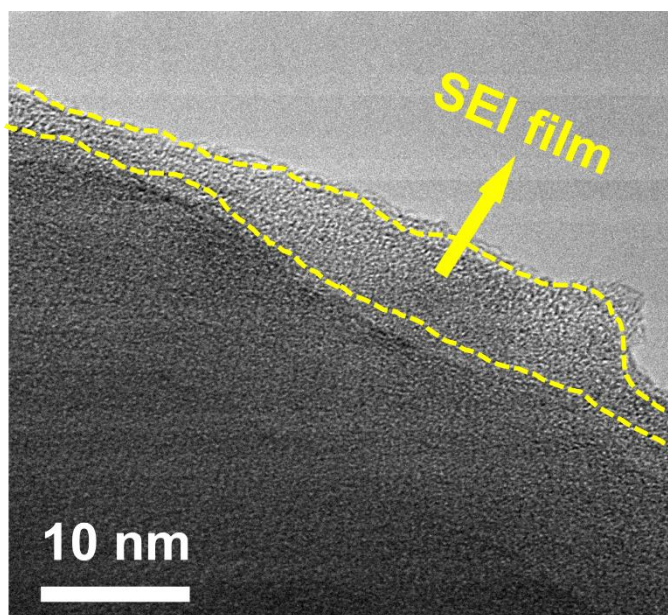

Figure S4. High-resolution TEM image of SHC-450 discharge to 0.01 V at the initial cycle.

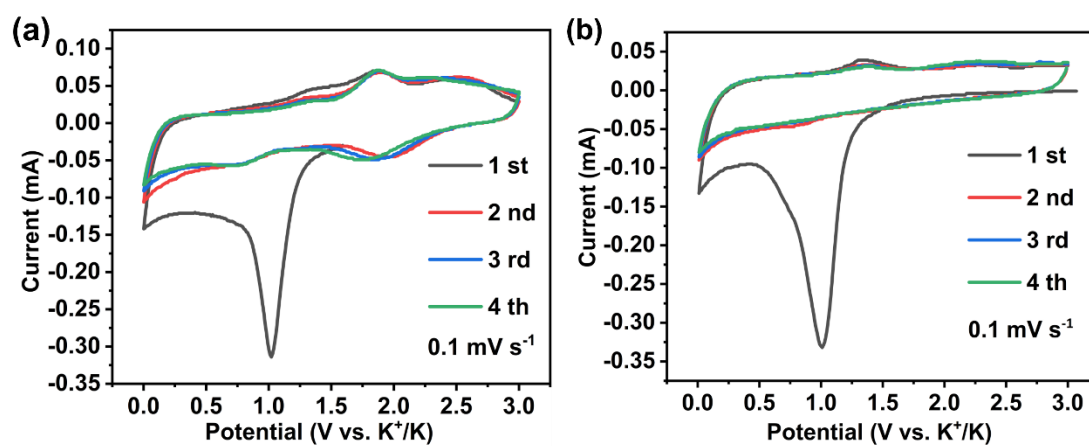

Figure S5. CV curves of SHC-450 and HC-450 at a scan rate of  $0.1 \text{ mV s}^{-1}$

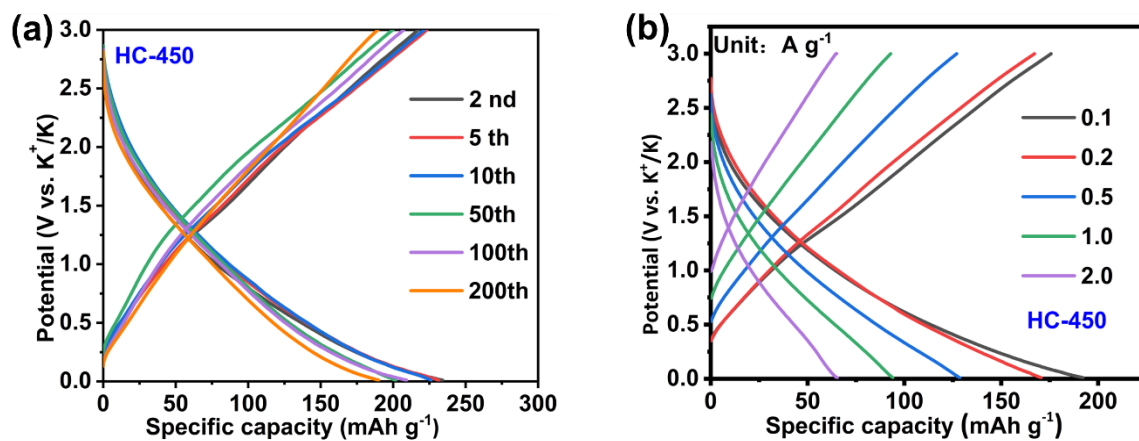

Figure S6. (a) Charge-discharge profiles for HC-450 during cycling at current density of  $0.1 \text{ A g}^{-1}$ . (b) The corresponding charge and discharge voltage profiles of HC-450 at current densities from 0.1 to  $2 \text{ A g}^{-1}$ .

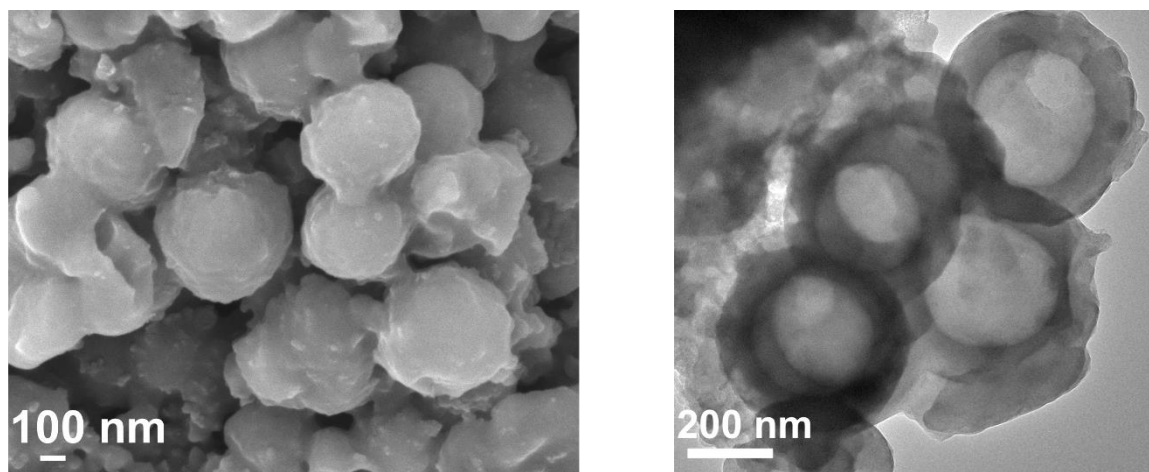

Figure S7. High-resolution SEM and TEM images of SHC-450 after 200 cycles at  $0.1 \text{ A g}^{-1}$ .



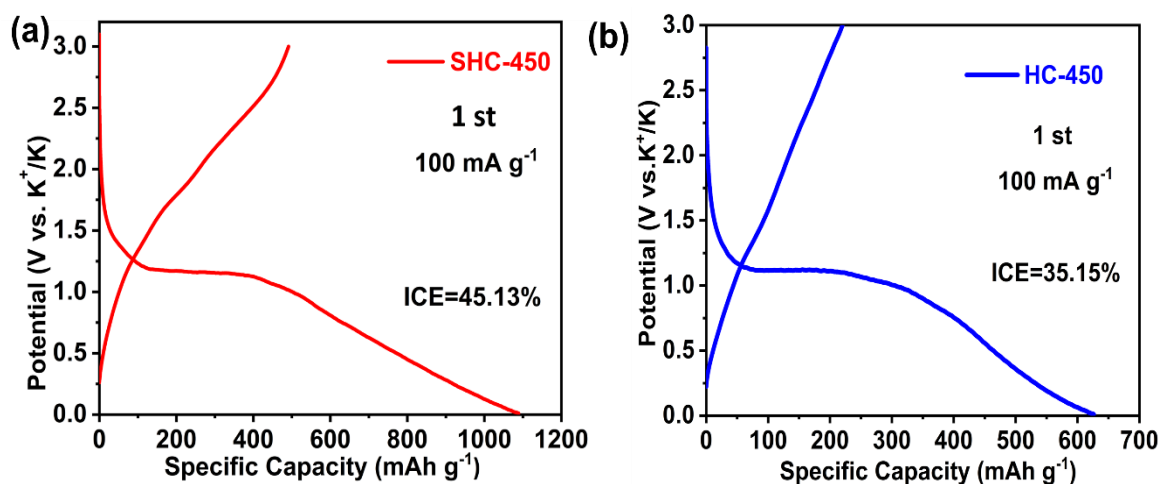

Figure S8. The charge–discharge profile and specific capacity for the initial cycle: (a) SHC-450 and (b) HC-450.

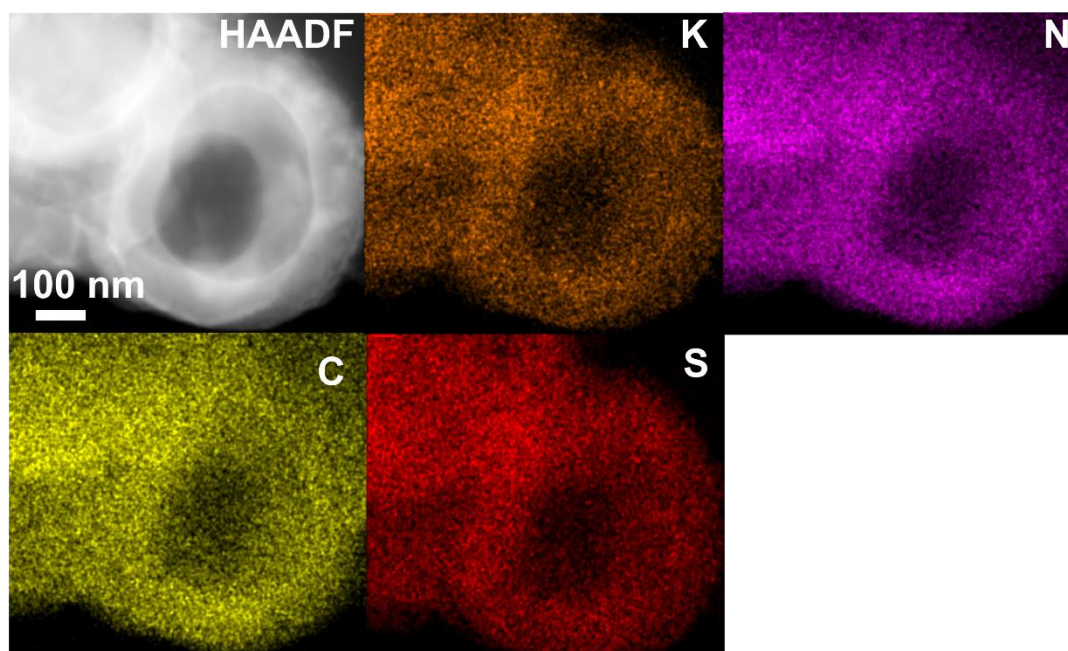

Figure S9. EDS mapping of the potassiated SHC-450.

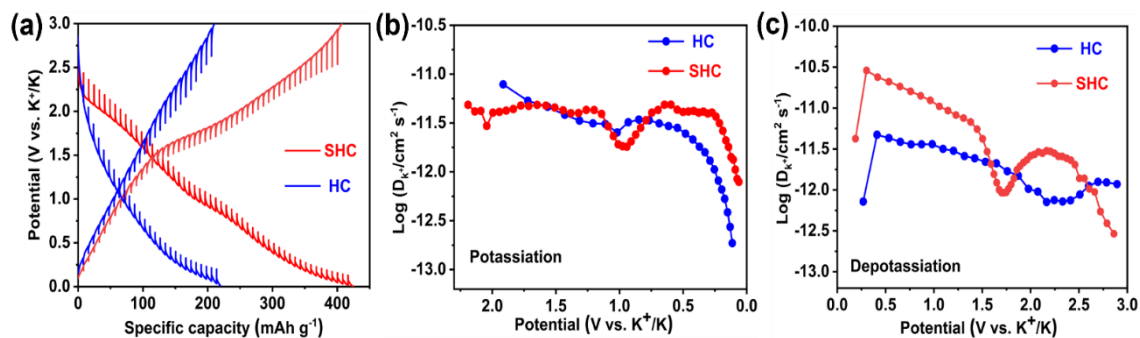

Figure S10. GITT profiles and corresponding K<sup>+</sup> diffusion coefficients of SHC-450 and HC-450 after the five cycles at 0.1 A g<sup>-1</sup>.

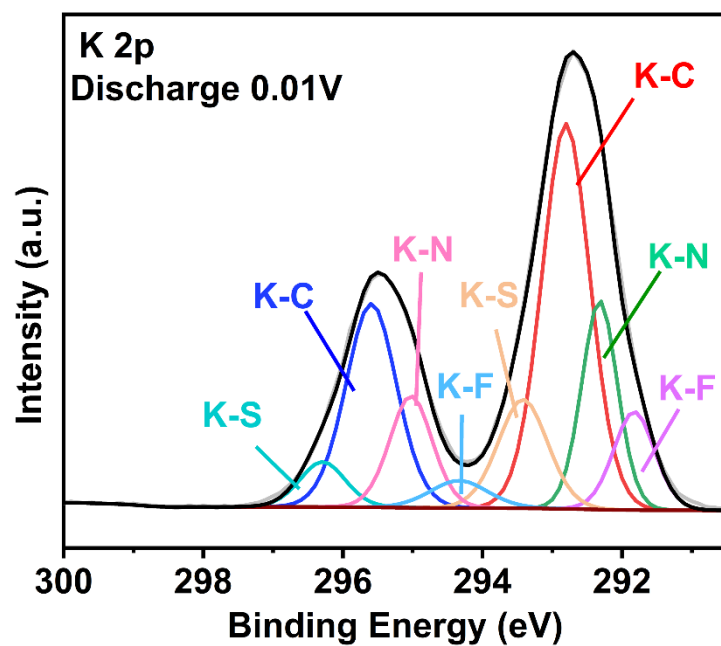

Figure S11. K 2p XPS spectra of SHC-450 when discharging to 0.01 V.



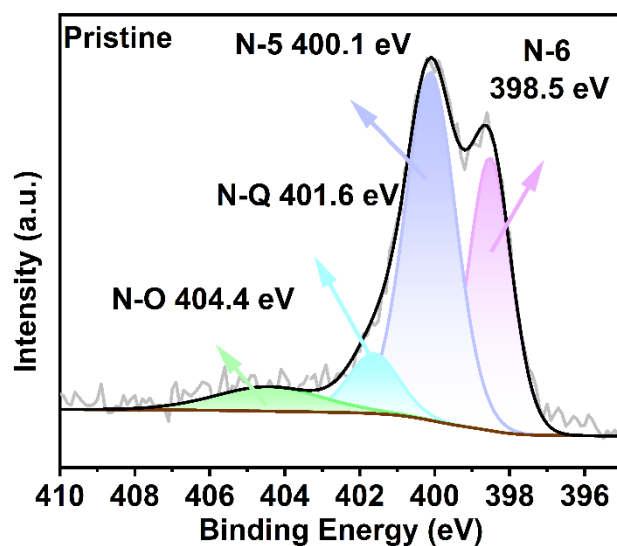

Figure S12. N 1s XPS spectra of SHC-450.

Table S1. A comparison of element contents of SHC-450 and HC-450 based on COHNS analysis.

| Samples | Mass Fraction (wt%) |       |        |      |        |
|---------|---------------------|-------|--------|------|--------|
|         | C                   | H     | O      | N    | S      |
| SHC-450 | 55.15               | 2.108 | 12.931 | 7.15 | 20.948 |
| HC-450  | 72                  | 3.279 | 14.616 | 8.55 | 0.583  |
